# Supplementary material
Source: Springer Nature journal article supplement (https://www.springermedizin.de/resource/supplementary/12879_2013_3168_MOESM2_ESM.pdf/9446074)

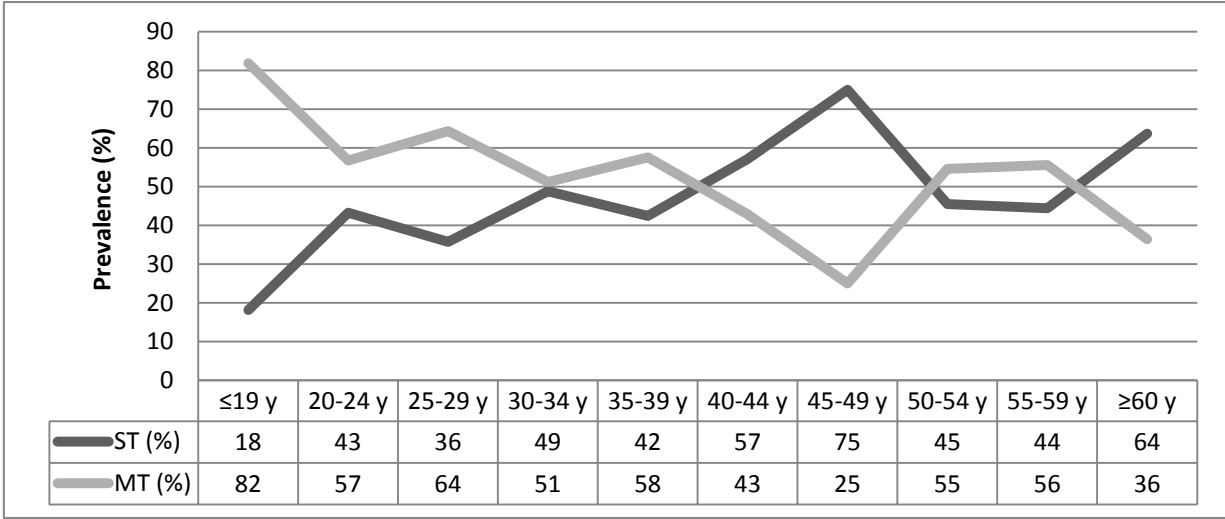

Figure.2 Prevalence of single-type (ST) and multiple-type (MT) HPV infection *per* age strata  
y=years

---

Supplement: MOESM2 [file 9446074]
